# Supplementary material for: A new high-pressure polymorph of K2MoO2F4
Source: Royal Society of Chemistry journal article supplement (doi:10.1039/d3dt02992a), 2023-01-01
Supplement: d3dt02992a1.pdf [file d3dt02992a1.pdf]

## Electronic Supplementary Information (ESI)

### A New High-Pressure Polymorph of $\text{K}_2\text{MoO}_2\text{F}_4$

Fabian Zimmerhofer and Hubert Huppertz\*

**\*Corresponding author: Hubert Huppertz**, University of Innsbruck, Institute of General, Inorganic and Theoretical Chemistry, Innrain 80–82, 6020 Innsbruck, Austria;

E-mail: [Hubert.Huppertz@uibk.ac.at](mailto:Hubert.Huppertz@uibk.ac.at)

ORCID: <https://orcid.org/0000-0002-2098-6087>

**Fabian Zimmerhofer**, University of Innsbruck, Institute of General, Inorganic and Theoretical Chemistry, Innrain 80-82, 6020, Innsbruck, Austria

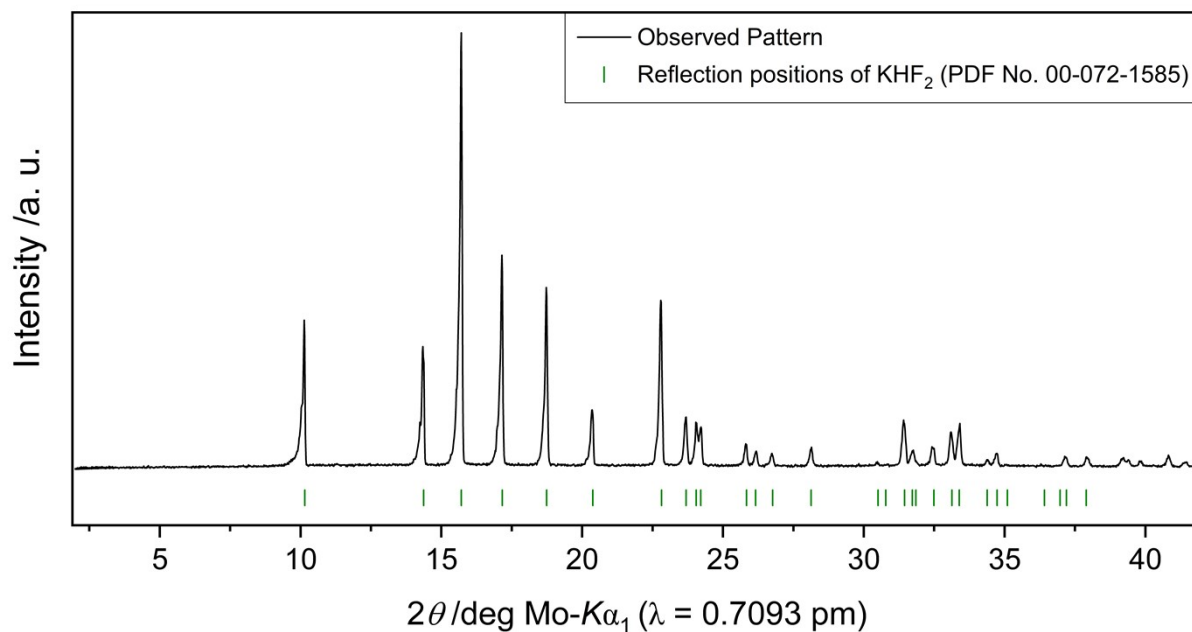

**Figure S1:** Indexed powder pattern of KHF<sub>2</sub> used as a starting material.

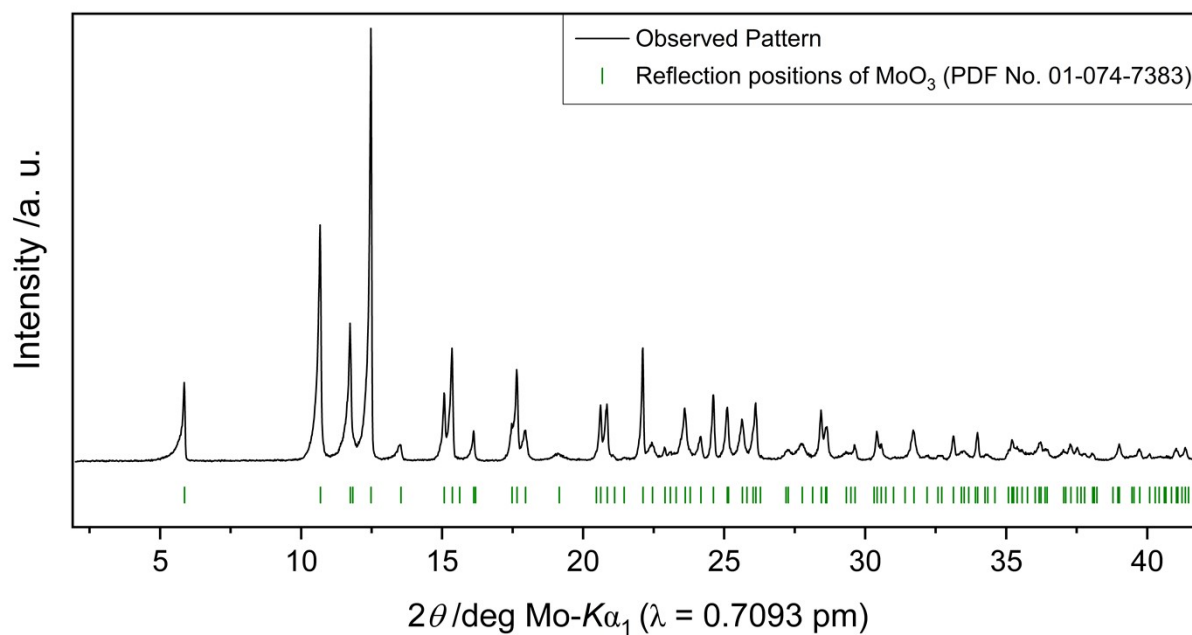

**Figure S2:** Indexed powder pattern of MoO<sub>3</sub> used as a starting material.

Rietveld analysis was performed using the software package DIFFRAC<sup>PLUS</sup>-TOPAS 4.2 (Bruker AXS, Karlsruhe, Germany)<sup>1</sup> using a PXRD pattern of the sample and the single-crystal structure solutions of HP-K<sub>2</sub>MoO<sub>2</sub>F<sub>4</sub> and K<sub>2</sub>MoO<sub>2</sub>F<sub>4</sub> · H<sub>2</sub>O (ICSD Collection Code 24913) as a starting point. Peak shape fitting was carried out using pseudo-Voigt profiles and a LaB<sub>6</sub> standard was used for calibration. Additional parameters as well as analysis results are reported in Table S1. Due to high background contribution, overlap of significant reflections and the presence of additional unidentified side phases, the estimated error for the calculated weight percentages is rather large.

**Table S1:** Rietveld refinement data.

|                                                                                 |                        |
|---------------------------------------------------------------------------------|------------------------|
| <b>Instrument parameters</b>                                                    |                        |
| Powder diffractometer                                                           | STOE Stadi P           |
| Radiation; wavelength $\lambda$ /pm                                             | MoK $\alpha_1$ ; 70.93 |
| Temperature /K                                                                  | 301(2)                 |
| <b>Global R-values</b>                                                          |                        |
| R <sub>exp</sub> /%                                                             | 7.07                   |
| R <sub>wp</sub> /%                                                              | 9.54                   |
| R <sub>p</sub> /%                                                               | 7.22                   |
| Goof                                                                            | 1.35                   |
| <b>Corrections</b>                                                              |                        |
| Zero error                                                                      | -0.0065(14)            |
| LP Factor                                                                       | 12.466                 |
| Absorption /cm <sup>-1</sup>                                                    | 89.09948               |
| <b>Background</b>                                                               |                        |
| Chebychev polynomial                                                            | Order 50               |
| <b>Structure 1 – HP-K<sub>2</sub>MoO<sub>2</sub>F<sub>4</sub></b>               |                        |
| Spacegroup                                                                      | C2/m                   |
| <i>a</i> /Å                                                                     | 13.9027(17)            |
| <i>b</i> /Å                                                                     | 5.81072(55)            |
| <i>c</i> /Å                                                                     | 6.90279(79)            |
| $\beta$ /deg                                                                    | 90.254(11)             |
| <i>V</i> /Å <sup>3</sup>                                                        | 557.63(11)             |
| Wt% - Rietveld                                                                  | 83(32)                 |
| Preferred Orientation Spherical Harmonics                                       | Order 8                |
| <b>Structure 2 – K<sub>2</sub>MoO<sub>2</sub>F<sub>4</sub> · H<sub>2</sub>O</b> |                        |
| Spacegroup                                                                      | P2 <sub>1</sub> /c     |
| <i>a</i> /Å                                                                     | 6.3057(35)             |
| <i>b</i> /Å                                                                     | 6.0758(26)             |
| <i>c</i> /Å                                                                     | 18.0912(85)            |
| $\beta$ /deg                                                                    | 93.653(68)             |
| <i>V</i> /Å <sup>3</sup>                                                        | 691.71(59)             |
| Wt% - Rietveld                                                                  | 17(32)                 |
| Preferred Orientation Spherical Harmonics                                       | Order 8                |

1 A.A. Coelho, *J. Appl. Crystallogr.*, 2018, **51**, 210–218.
